# Supplementary material for: Antioxidative Effect of Chlorella Pyrenoidosa Protein Hydrolysates and Their Application in Krill Oil-in-Water Emulsions
Source: MDPI journal article supplement (doi:10.3390/md20060345), 2022-05-25
Supplement: s1 [file s1]

## Supplementary data

### Results

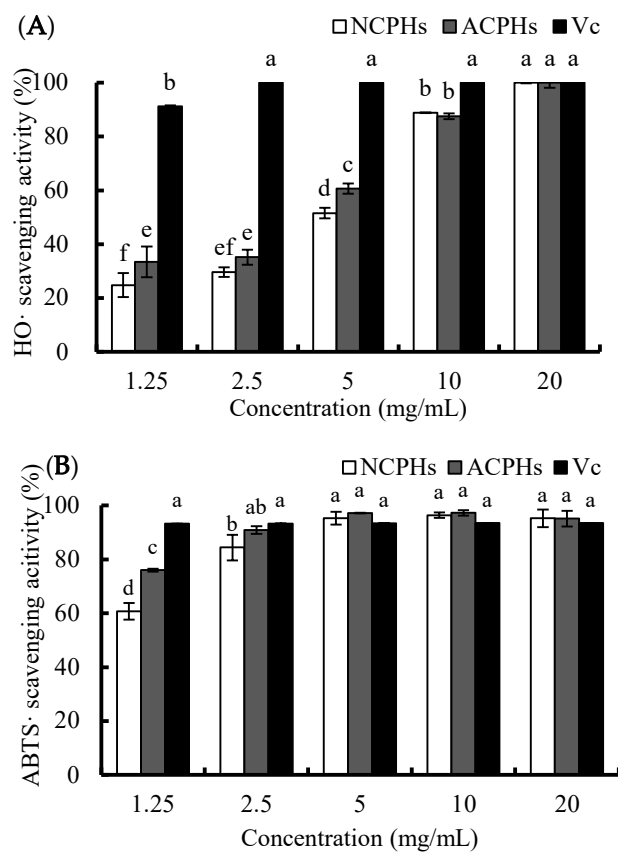

**Figure S1.** Hydroxyl (A) and ABTS (B) free radical scavenging activities of 0, 1.25, 2.5, 5, 10 and 20 mg/ml CPHs and VC. CPHs were obtained by neutral proteases (10000U) and alkaline protease (10000U) for 5 h, separately. Different letters above values are indicated with different significance ( $p < 0.05$ ).
